# Supplementary material for: Study of a multisite prospective adverse event surveillance system
Source: PubMed Central journal article supplement — BMJ Qual Saf. 2019 Jul 3;29(4):277–85. doi: 10.1136/bmjqs-2018-008664 (PMC7146931; doi:10.1136/bmjqs-2018-008664), 2019-07-03
Supplement: bmjqs-2018-008664supp001.pdf [file bmjqs-2018-008664supp001.pdf]

## APPENDIX A

### Triggers used in prospective AE surveillance

---

#### Laboratory based triggers

|                 |                    |                                   |
|-----------------|--------------------|-----------------------------------|
| INR > 5         | Glucoscan < 3.0    | Phosphate < 0.4                   |
| K < 2.8         | Glucoscan > 18 * 2 | Mg < 0.4                          |
| K > 6.0         | WBC < 3.0          | Mg > 5.0                          |
| Na < 120        | WBC > 18           | pH < 7.25                         |
| Na < 150        | Hb decrease > 20%  | pH > 7.5                          |
| Cr > 25% change | Plt decrease > 50% | Positive HIT assay                |
| Ck > 500        | Calcium < 1.5      | Positive blood culture            |
|                 | Calcium > 3.0      | Positive c. difficile toxin assay |

---

#### Patient based triggers

|                              |                             |                                                          |
|------------------------------|-----------------------------|----------------------------------------------------------|
| Respiratory distress/Dyspnea | Unexpected death            | CV Line infection                                        |
| Chest pain                   | New DVT/PE                  | CV Line complication - pneumothorax                      |
| O2 sat < 90%                 | New Pressure Ulcer          | CV Line complication - arterial injury                   |
| Systolic BP < 100            | Fall resulting in injury    | CV Line complication - difficult insertion (>3 attempts) |
| HR > 110                     | Pneumothorax                | CV Line complication - other                             |
| Temp > 39C                   | Return to OR                | Family/Patient dissatisfied with care                    |
| Temp < 35C                   | New gastric/duodenal ulcer  | Altered Level of consciousness                           |
| Rash                         | Surgical Wound Complication |                                                          |
| Nausea/Vomiting              | Compartment Syndrome        |                                                          |

---

#### System based triggers

|                                                       |                                 |                          |
|-------------------------------------------------------|---------------------------------|--------------------------|
| Line complication                                     | Use of physical restraints      | Delay in therapy         |
| Foley complication                                    | RACE call                       | OR cancellation          |
| Stat ECG                                              | Code Blue call                  | Diagnostic Error         |
| Portable x-ray on floor                               | Transfer to ICU                 | Order for Blood Products |
| New Isolation Precautions                             | IV pump error                   |                          |
| Medical equipment problem                             | Medication administration error |                          |
| Unable to obtain MD in a timely manner                |                                 |                          |
| Unable to obtain consultant in a timely manner        |                                 |                          |
| Unable to obtain critical care bed in a timely manner |                                 |                          |
| Equipment unavailable in emergency situation          |                                 |                          |

---

#### Pharmacy based triggers

|                      |                     |
|----------------------|---------------------|
| Order for Flumazenil | Order for Vitamin K |
| Order for Nalaxone   | Order for Protamine |
| Order for FFP        |                     |

## APPENDIX B

### Clinical review questions and event definitions

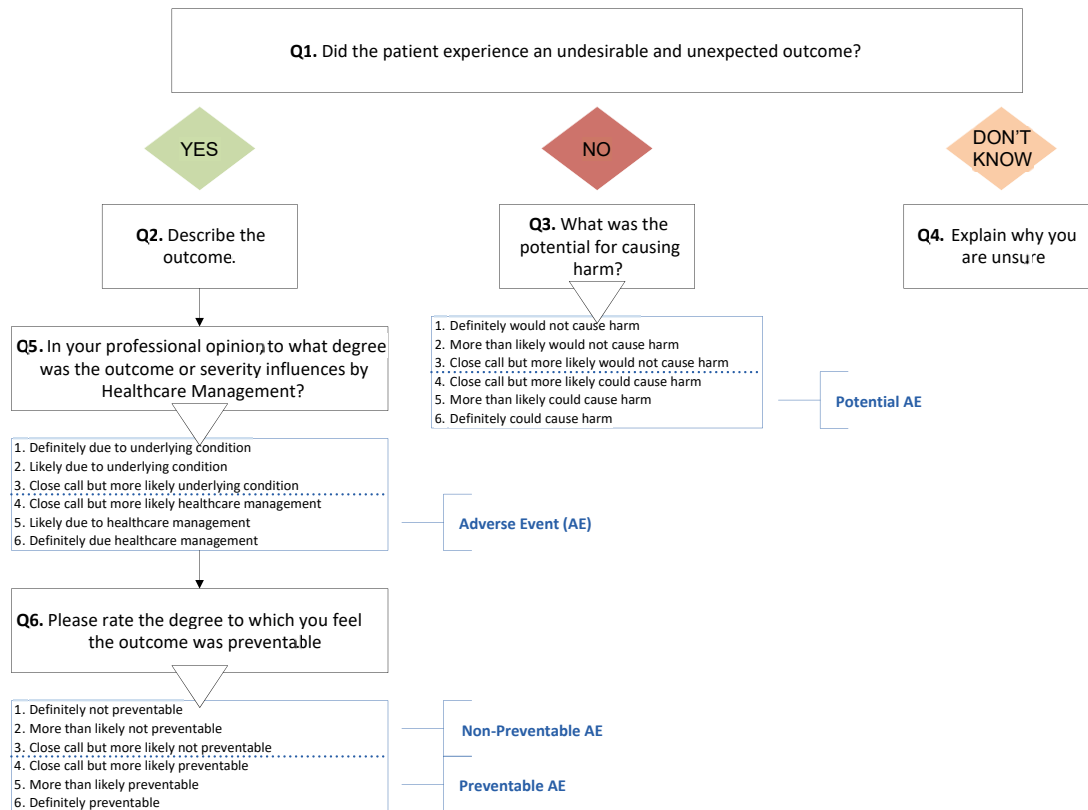

## APPENDIX C

## Triggers identified as adverse events by reviewers

| Event source<br>(Hospital) | Reviewer (Hospital) |             |             |             |             | Total by<br>event source |
|----------------------------|---------------------|-------------|-------------|-------------|-------------|--------------------------|
|                            | A                   | B           | C           | D           | E           |                          |
| A                          | 4/10                | 3/10        | 3/10        | 4/10        | 2/10        | 16/50 (32%)              |
| B                          | 4/10                | 3/10        | 6/10        | 2/10        | 5/10        | 20/50 (40%)              |
| C                          | 3/10                | 3/10        | 4/10        | 3/10        | 5/10        | 18/50 (36%)              |
| D                          | 2/10                | 2/10        | 2/10        | 3/10        | 4/10        | 13/50 (26%)              |
| E                          | 3/10                | 2/10        | 2/10        | 4/10        | 2/10        | 13/50 (26%)              |
| <b>Total by reviewer</b>   | 16/50 (32%)         | 13/50 (26%) | 17/50 (34%) | 16/50 (32%) | 18/50 (36%) |                          |

## Triggers identified as preventable adverse events by reviewers

| Event source<br>(Hospital) | Reviewer (Hospital) |            |             |             |             | Total by<br>event source |
|----------------------------|---------------------|------------|-------------|-------------|-------------|--------------------------|
|                            | A                   | B          | C           | D           | E           |                          |
| A                          | 3/10                | 3/10       | 3/10        | 4/10        | 2/10        | 15/50 (30%)              |
| B                          | 3/10                | 2/10       | 5/10        | 1/10        | 5/10        | 16/50 (32%)              |
| C                          | 3/10                | 2/10       | 4/10        | 3/10        | 5/10        | 17/50 (34%)              |
| D                          | 2/10                | 2/10       | 2/10        | 3/10        | 4/10        | 13/50 (26%)              |
| E                          | 3/10                | 0/10       | 2/10        | 2/10        | 1/10        | 8/50 (16%)               |
| <b>Total by reviewer</b>   | 14/50 (28%)         | 9/50 (18%) | 16/50 (32%) | 13/50 (26%) | 17/50 (34%) |                          |

Note: Each reviewer rated the same 50 cases.
